# Supplementary material for: Studies on the photodegradation of red, green and blue phosphorescent OLED emitters
Source: PubMed Central journal article supplement (PMC3817512; doi:10.3762/bjoc.9.245), 2013-10-11

# Supporting Information

## for

### Studies on the photodegradation of red, green and blue phosphorescent OLED emitters

Susanna Schmidbauer<sup>§</sup>, Andreas Hohenleutner<sup>§</sup> and Burkhard König\*

Address: Institut für Organische Chemie, Universität Regensburg, Universitätsstraße 31, D-93053 Regensburg, Germany

E-mail: Burkhard König - [burkhard.koenig@chemie.uni-regensburg.de](mailto:burkhard.koenig@chemie.uni-regensburg.de)

<sup>§</sup>These authors contributed equally

\*Corresponding author

## Reproducibility of degradation studies and degradation curves

### Contents

|                                                                                                                                                                                                      |    |
|------------------------------------------------------------------------------------------------------------------------------------------------------------------------------------------------------|----|
| Reproducibility of the degradation studies in toluene under ambient conditions .....                                                                                                                 | S2 |
| Reproducibility of the degradation studies in a PMMA matrix under ambient conditions .....                                                                                                           | S3 |
| Degradation curves of Ir(piq) <sub>3</sub> , Ir(ppy) <sub>3</sub> , Ir(Me-ppy) <sub>3</sub> and Ir(F,CN-ppy) <sub>3</sub> in CH <sub>2</sub> Cl <sub>2</sub> under ambient and inert conditions..... | S4 |
| Degradation curves of Ir(piq) <sub>3</sub> , Ir(ppy) <sub>3</sub> , Ir(Me-ppy) <sub>3</sub> and Ir(F,CN-ppy) <sub>3</sub> in benzene and toluene under ambient and inert conditions .....            | S5 |

Reproducibility of the degradation studies in toluene under ambient conditions

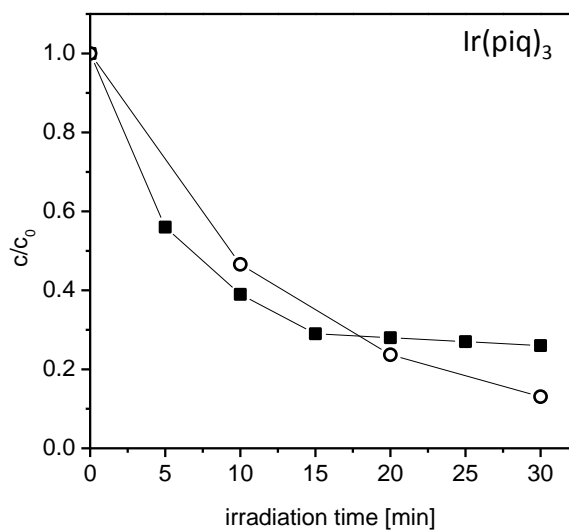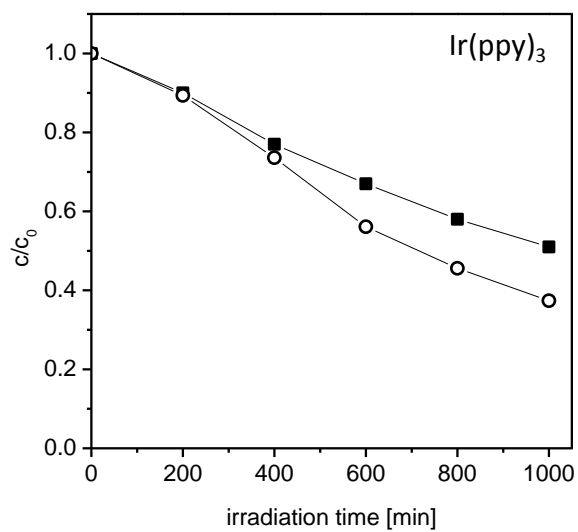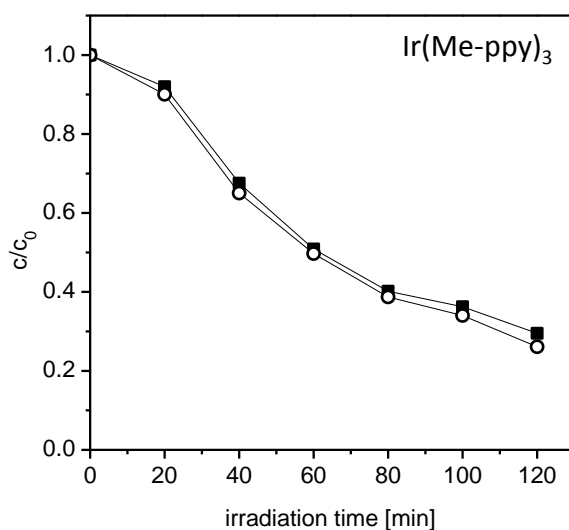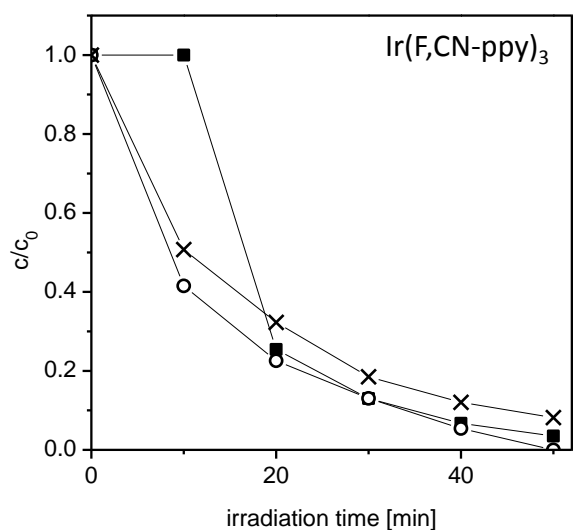

Reproducibility of the degradation studies in a PMMA matrix under ambient conditions

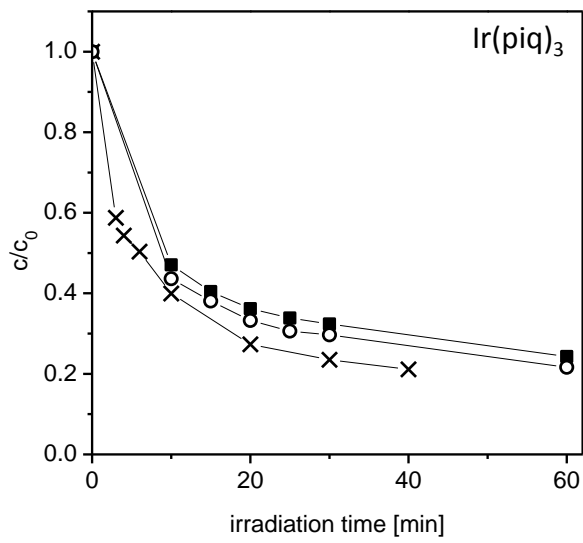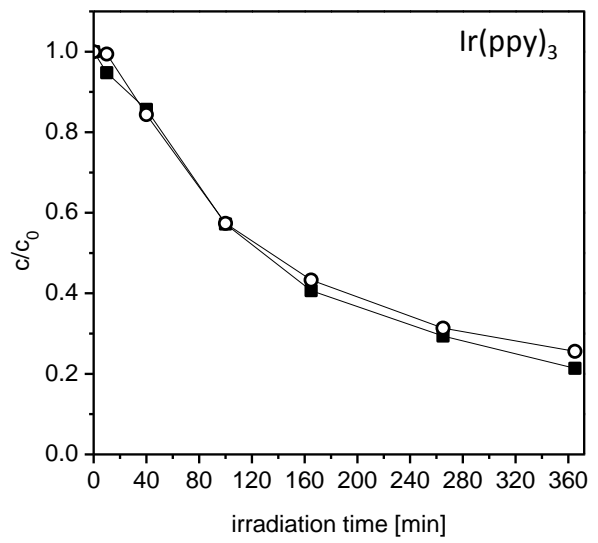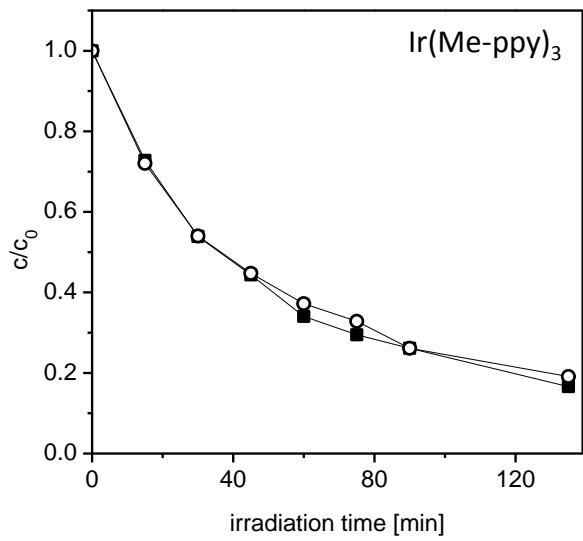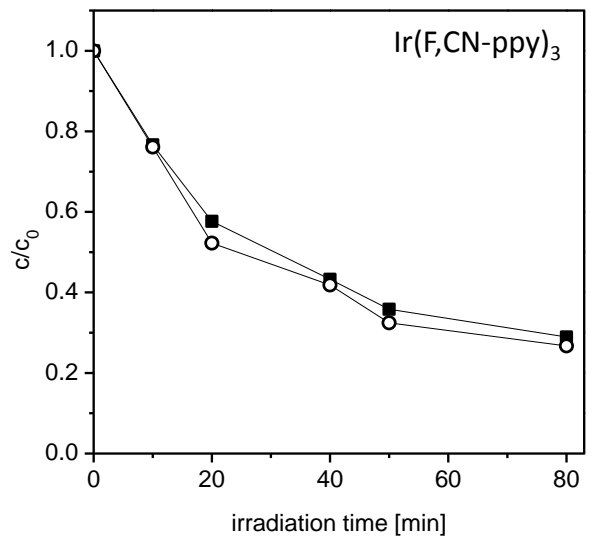

Degradation curves of Ir(piq)<sub>3</sub>, Ir(ppy)<sub>3</sub>, Ir(Me-ppy)<sub>3</sub> and Ir(F,CN-ppy)<sub>3</sub> in CH<sub>2</sub>Cl<sub>2</sub> under ambient and inert conditions

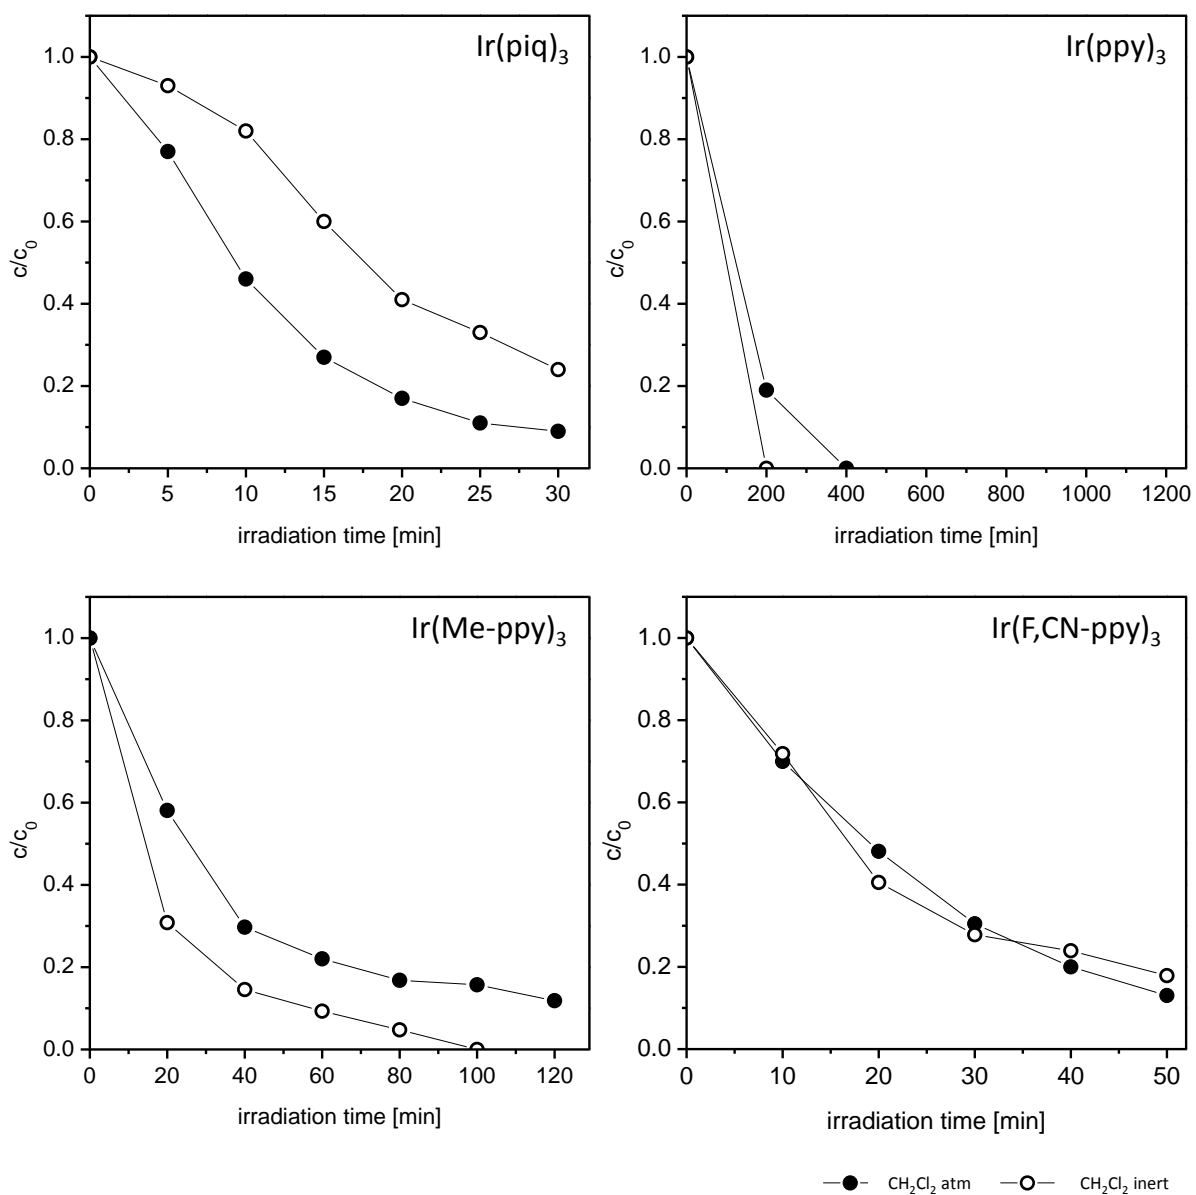

Degradation curves of Ir(piq)<sub>3</sub>, Ir(ppy)<sub>3</sub>, Ir(Me-ppy)<sub>3</sub> and Ir(F,CN-ppy)<sub>3</sub> in benzene and toluene under ambient and inert conditions

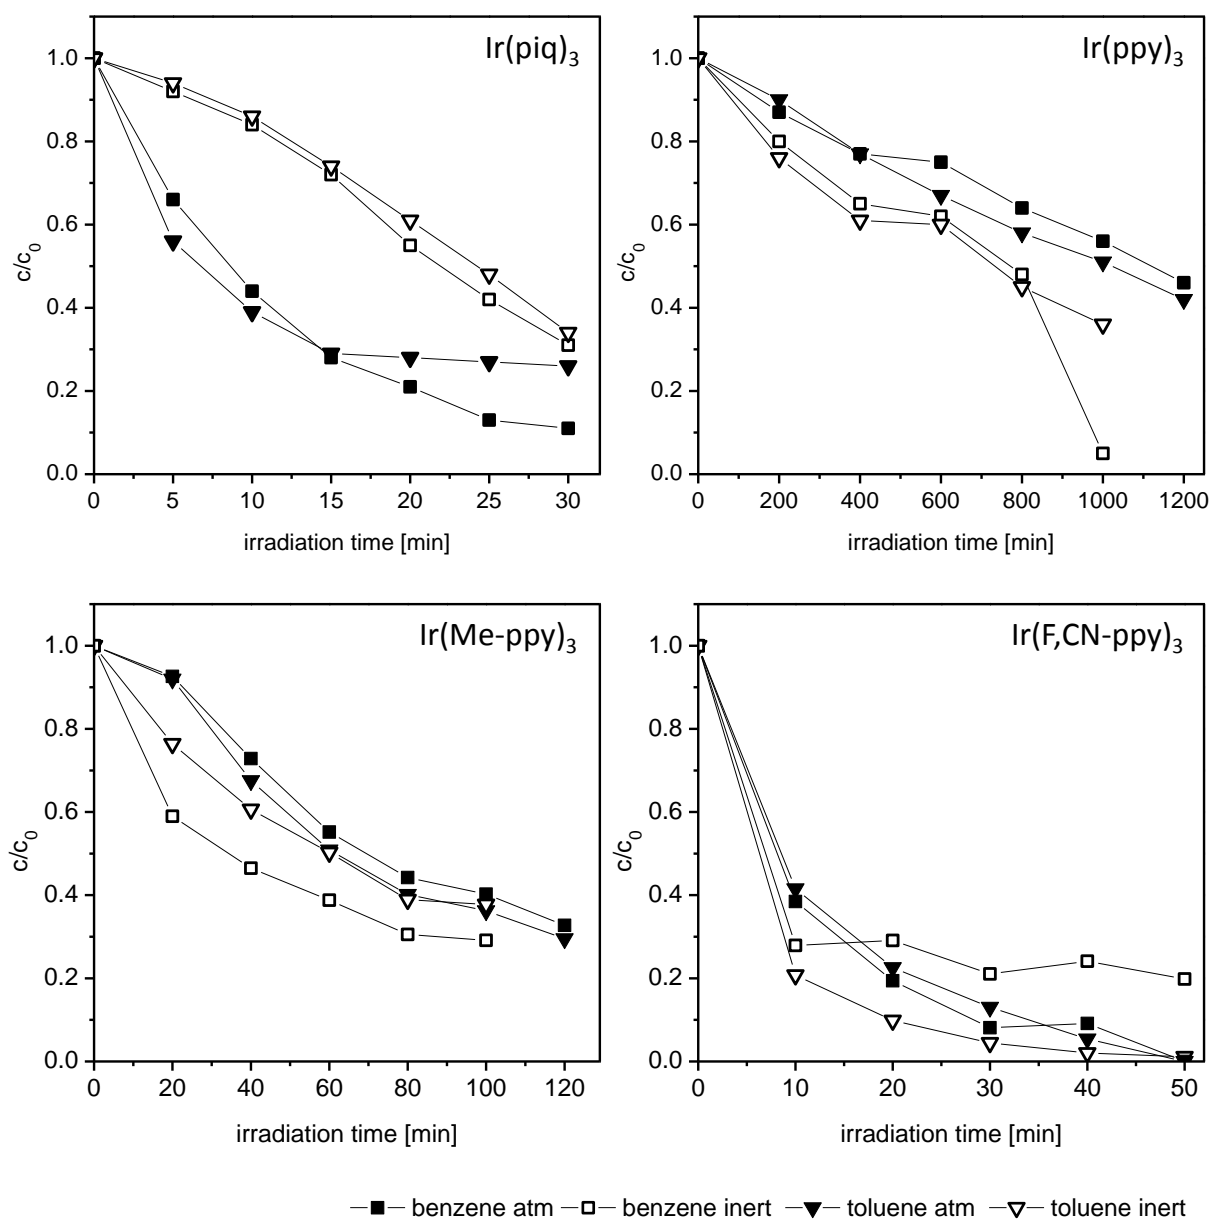

Supplement: Beilstein_J_Org_Chem-09-2088-s001.pdf [file Beilstein_J_Org_Chem-09-2088-s001.pdf]
